# Supplementary material for: Constrictive Pericarditis: A Challenging Diagnosis in Paediatrics
Source: Case Rep Cardiol. 2015 Sep 6;2015:402740. doi: 10.1155/2015/402740 (PMC4575721; doi:10.1155/2015/402740)
Supplement: Supplementary file 1 — Clip 1 (Optional Supplementary Materials): Echocardiography showing significant enlargement of the right atria, inferior vena cava and suprahepatic veins and interventricular septal bounce, suggesting ventricular interaction. [file 402740.f1.zip]

Archive with 2 entries (2 files):
- mat.402740.v1.wmv
- mat.402740.v2.wmv
